# Supplementary material
Source: MDPI journal article supplement (https://www.mdpi.com/2073-4441/11/8/1711)

**Figure S1.** Canonical correspondence analysis (CCA) and Variance partition analysis (VPA) of bacterial communities and nutrient ratios in Erhai Lake (a, c, and e) and Streams (b, d, and f). Variance partition analysis (VPA) determined the relative contributions of C:N, C:P, and N:P.

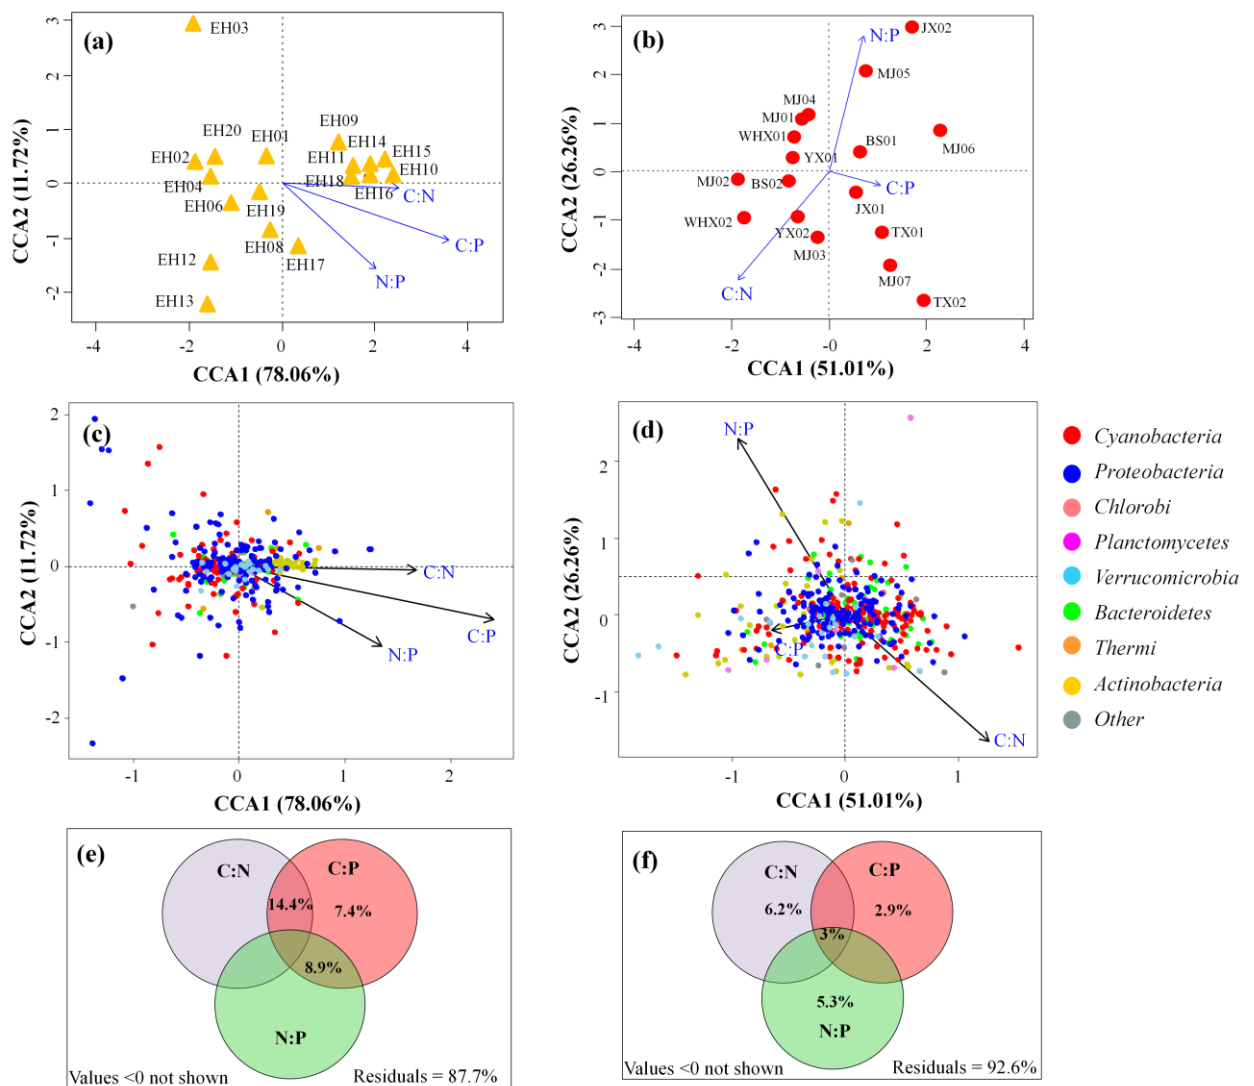

Supplement: s1 [file s1]
